# Supplementary material for: Using infective mosquitoes to challenge monkeys with Plasmodium knowlesi in malaria vaccine studies
Source: Malar J. 2014 Jun 3;13:215. doi: 10.1186/1475-2875-13-215 (PMC4070636; doi:10.1186/1475-2875-13-215)
Supplement: Additional file 2 — Monkey infections after exposures to P. knowlesi infected mosquitoes. Description of data: This spreadsheet provides the infection results of 49 monkey exposures to P. knowlesi infected mosquitoes, as well as the data from the mosquito dissections. [file 1475-2875-13-215-S2.xlsx]

## Sheet:  mosquito transmissions
Exposure number	Exposure category	# mos with both +spz and +blood	#mos with +spz but no blood	Monkey infected		Definitions
1	A	10	6	yes		Exposure number:
2	A	5	0	yes		Each number represents a monkey exposed for 15-30
3	A	3.3	8	yes		minutes to a carton containing from 3 to 20 mosquitoes.
4	A	3	10	yes		All mosquitoes were dissected looking for Pk sporozoites
5	A	3	8	yes		in salivary glands and ingested blood.
6	A	3	6	yes
7	A	2	10	yes		Exposure category:
8	A	2	9	yes		A: 2 or more mosquitoes with both sporozoites in salivary glands and ingested blood
9	A	2	3	yes		B: 1 mosquito with both sporozoites in salivary glands and ingested blood
10	B	1	8	yes		C: no mosquito with both sporozoites in salivary glands and ingested blood
11	B	1	5	yes		but some mosquitoes with sporozoites in salivary glands
12	B	1	1	yes		D: no mosquito with sporozoites in salivary glands
13	B	1	1	yes		but some may have ingested blood
14	B	1	0	yes
15	B	1	0	yes		Monkey infected:
16	B	1	0	yes		monkeys were followed for 30 days to see if they became infected with Pk
17	B	1	0	yes
18	C	0	2	yes
19	C	0	2	no
20	C	0	1	yes
21	C	0	1	yes
27	C	0	1	yes
22	C	0	1	no
23	C	0	1	no
24	C	0	1	no
25	C	0	1	no
26	C	0	1	no
28	D	0	0	yes
29	D	0	0	no
30	D	0	0	no
31	D	0	0	no
32	D	0	0	no
33	D	0	0	no
34	D	0	0	no
35	D	0	0	no
36	D	0	0	no
37	D	0	0	no
38	D	0	0	no
39	D	0	0	no
40	D	0	0	no
41	D	0	0	no
42	D	0	0	no
43	D	0	0	no
44	D	0	0	no
45	D	0	0	no
46	D	0	0	no
47	D	0	0	no
48	D	0	0	no
49	D	0	0	no
